# Supplementary material for: Eye Movement Patterns in Natural Reading: A Comparison of Monolingual and Bilingual Reading of a Novel
Source: PubMed Central journal article supplement (PMC4545791; doi:10.1371/journal.pone.0134008), 2015-08-19
Supplement: pone.0134008.s001.pdf [file pone.0134008.s001.pdf]

## Additional Tables

Table A

*Count of bilingual participants agreeing and not agreeing on second language skills items.*

| <b>Skills</b>                           | Agree | Don't Agree |
|-----------------------------------------|-------|-------------|
| Carry on normal conversation in L2      | 19    | 0           |
| Watch television shows in L2            | 19    | 0           |
| Listen to music in L2                   | 19    | 0           |
| Read and comprehend questions in L2     | 19    | 0           |
| Read books or articles in L2            | 19    | 0           |
| No problems in understanding L1 speaker | 18    | 1           |
| Carry on a discussion in L2             | 17    | 2           |
| Love speaking L2                        | 16    | 3           |
| Explain difficult situation in L2       | 15    | 4           |
| Answer difficult questions in L2        | 12    | 7           |
| Think in L2                             | 11    | 8           |
| Speak to myself in L2                   | 10    | 9           |
| Write in L2                             | 8     | 11          |
| Make no/ almost no mistakes in L2       | 6     | 13          |
| Dream in L2                             | 5     | 14          |

Table B

*Count of bilingual participants agreeing and not agreeing on second language switching items.*

| Switching                                                                   | Agree | Don't Agree |
|-----------------------------------------------------------------------------|-------|-------------|
| I'm sometimes in a tip of the tongue state                                  | 16    | 3           |
| I sometimes can't get the right word                                        | 14    | 5           |
| I use a different language when I do not remember a word                    | 13    | 6           |
| I often use different languages intermixed                                  | 9     | 10          |
| I often use different languages intermixed without noticing                 | 5     | 14          |
| I sometimes speak in a language that my dialogue partner doesn't understand | 5     | 14          |
